# Supplementary material
Source: PubMed Central journal article supplement (PMC4394229)
Supplement: jcmm0015-2200-sd1.pdf [file jcmm0015-2200-sd1.pdf]

**Supplementary Figure 1:** *Quantification by FACS analysis of the neurons differentiated within ES-PA6 co-cultures.*

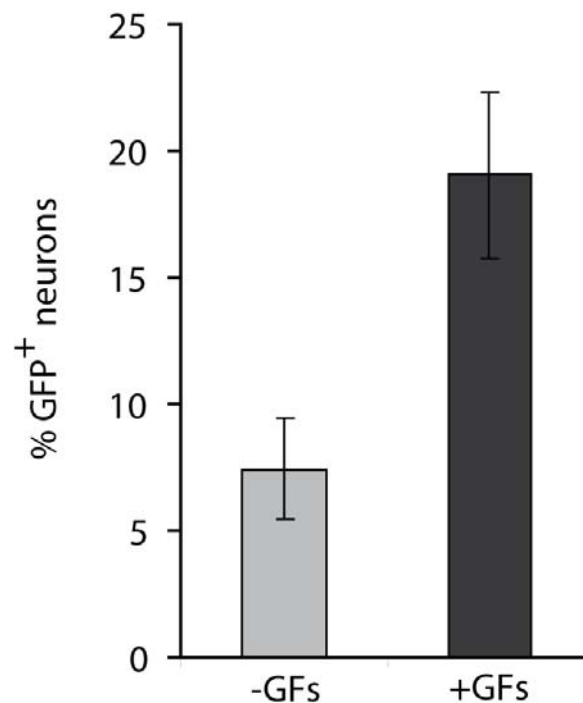

This analysis takes advantage of the fact that the ES cells used in these experiments were engineered by a knock-in strategy (Ying QL et al., Nat Biotechnol., 21(2):183-186, 2003). GFP gene was integrated into the Tau locus and therefore expressed only in neurons. After 7 days of co-culturing ES cells with PA6 cells in the absence (-GFs) or in the presence of FGF2 and EGF (+GFs), single cells suspensions were prepared and analyzed by flow cytometry to detect GFP<sup>+</sup> cells. As shown in the histogram, the presence of GFs in the medium reinforced neurons differentiation.

**Supplementary Figure 2:** Cytofluorimetric absolute cells count of ES-derived cells and PA6 cells.

**A**

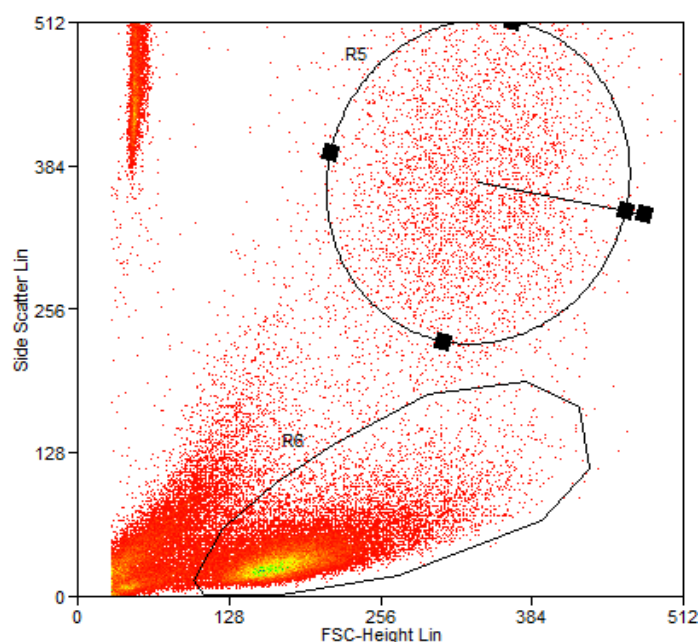

**B**

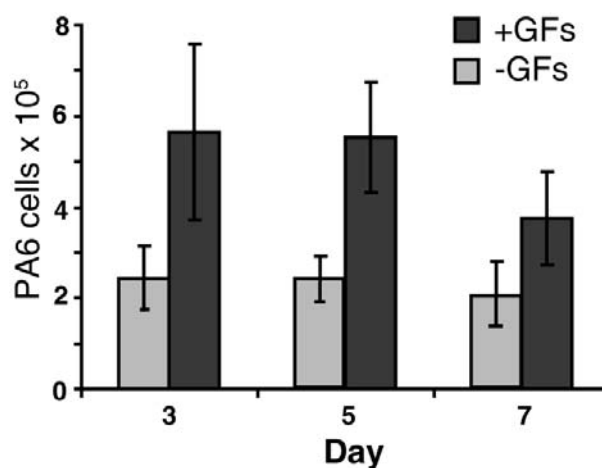

(A) ES-derived cells (R6, lower gate) and PA6 cells (R5, upper gate), visualized in the dot plot, can be easily separated thanks to their different physical parameters, thus allowing their independent analysis. The fluorescent beads used to perform the count are visible in the upper left side of the plot. (B) The number of PA6 cells in the co-cultures was analyzed during time and upon GFs stimulation. Since PA6 cells are growth-inhibited when confluent, their number did not increase during time. However, when GFs were added to the culture medium, PA6 cells proliferated until day three to stop their growth in the following days.

**Supplementary Figure 3:** *biochemical detection and quantification of Oct4 protein in ES-PA6 co-cultures.*

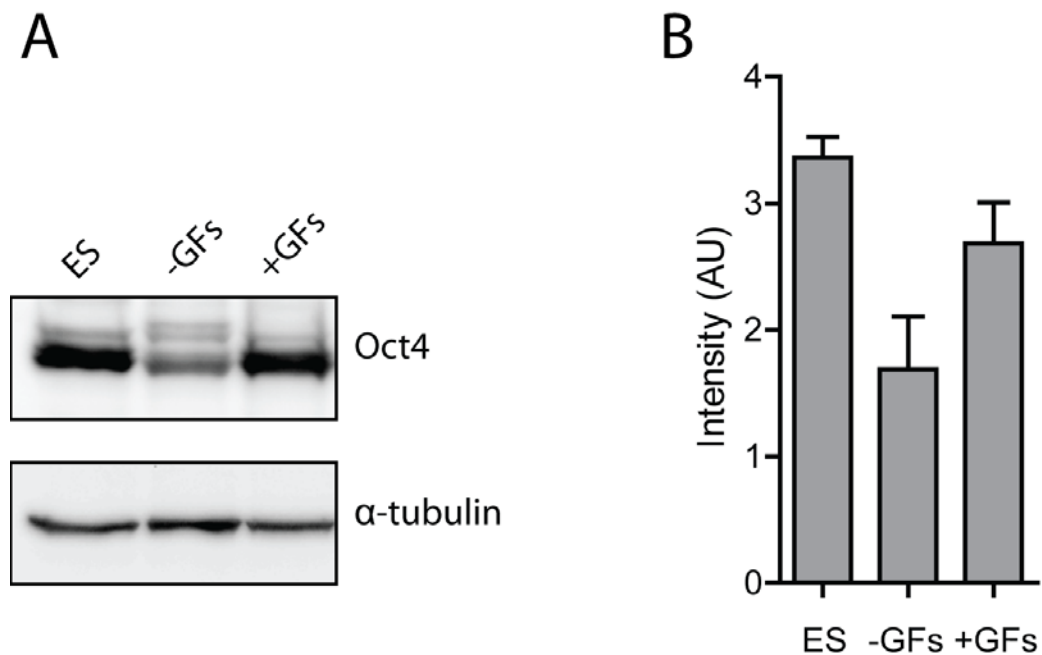

ES cells were co-cultured with PA6 cells for 7 days in N2B27 medium without growth factors (-GFs) or in the presence of FGF2 and EGF (+GFs). **(A)** Oct4 protein and the constitutively expressed  $\alpha$ -tubulin protein were detected by western blot in cell lysates purified from ES-PA6 co-cultures and pure cultures of undifferentiated ES cells (ES). **(B)** The immunoreactive bands were quantified by Quantity One software. In absence of GFs the level of Oct4 expression significantly decreased, whereas FGF2 and EGF contributed to maintain a stemness component within the co-cultures.

**Supplementary Figure 4:** *analysis of gene expression upon FGF2 or BMP4 stimulation.*

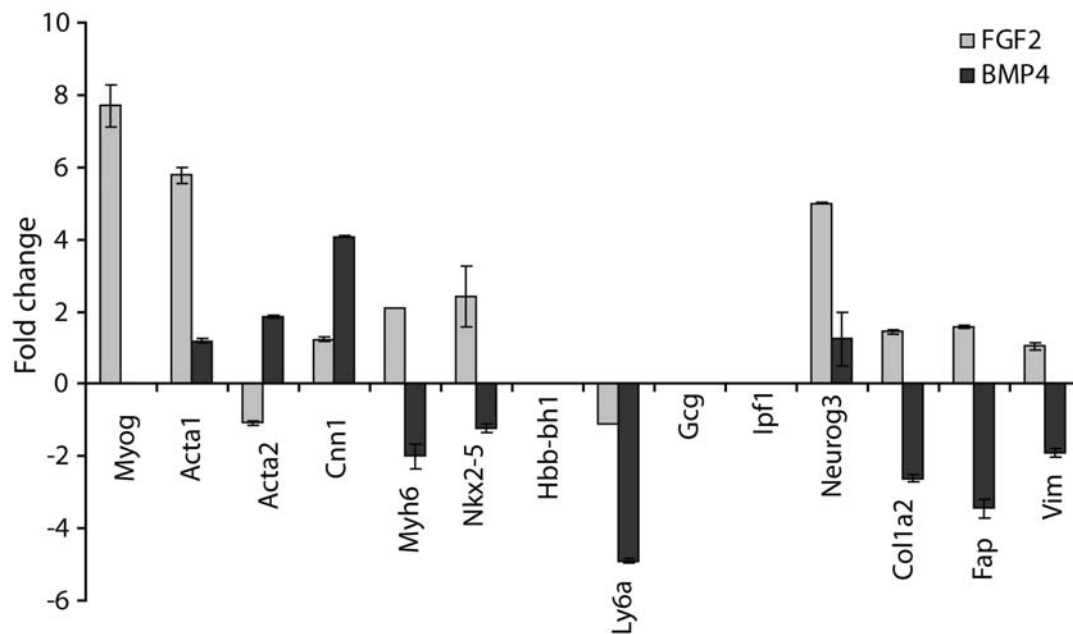

Co-cultures of ES and PA6 cells were grown for 6 days in N2B27 medium supplemented with FGF2 or BMP4. Total RNAs were purified and used to analyze the expression of genes representative of skeletal muscle (Myog, Acta1), smooth muscle (Acta2, Cnn1), cardiac muscle (Myh6, Nkx2-5), hematopoietic (Hbb-bh1, Ly6a), pancreatic (Gcg, Ipfl, Neurog3), fibroblasts (Col1a2, Fap, Vim) cells. The analysis was performed by using Taqman low density arrays. Data are normalized against the gene expression level measured in absence of growth factors and any variation of expression below 2 fold change was considered not significant. The experiment was performed in duplicate; error bars indicate SEM. Most of the genes analyzed were not significantly up-regulated and some of them were even down-regulated. For the exceptions Myog, Acta1 (skeletal muscle markers), Neurog3 (pancreatic marker) and Cnn1 (pericytes marker) the presence of the corresponding mature cell types was further investigated by immunofluorescence (see Supplementary Fig. 5 below).

**Supplementary Figure 5:** *characterization by immunofluorescence analysis of ES-PA6 co-cultures for the presence of glia, endoderm, pancreatic and smooth muscle cells.*

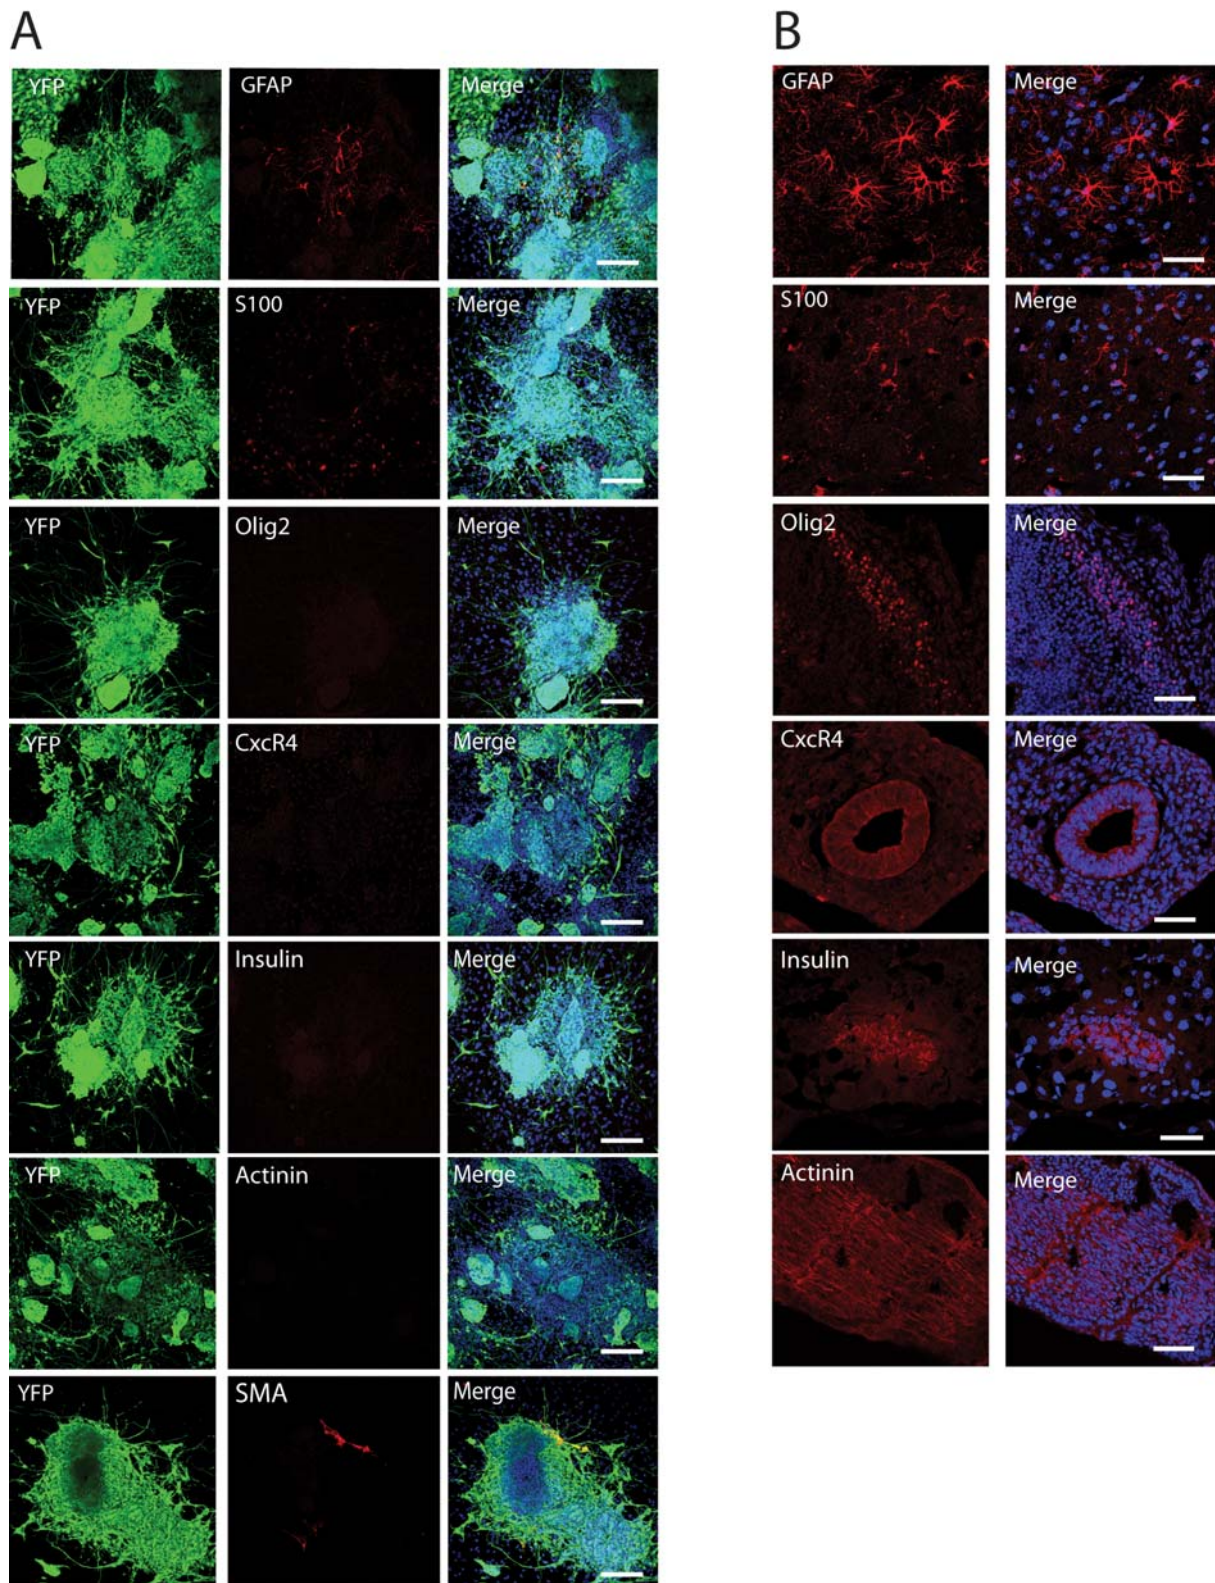

**(A)** After 7 days of co-culturing YFP-ES with PA6 cells in presence of FGF2 and EGF, cells were fixed and analyzed by immunofluorescence to detect astrocytes (with anti-GFAP and

S100 antibodies), oligodendrocytes (with anti-olig2 antibody), mesoderm (with anti-Cxcr4 antibody), skeletal muscle (with anti-Actinin antibody) and smooth muscle cells (with anti-SMA antibody). Other than few GFAP<sup>+</sup> and SMA<sup>+</sup> cells no oligodendrocytes, mesoderm or pancreatic cells were detected. Scale bars: 150  $\mu$ m **(B)** Sections of brain and pancreas from adult mouse were used as positive controls for the GFAP, Olig2, S100 and Insulin immunostainings, whereas the lung and tail sections used for Cxcr4 and Actinin immunostainings were obtained from day 13.5 mouse embryos. Scale bars 40  $\mu$ m except for actinin and olig2 immunostainings that are 75 and 50  $\mu$ m respectively.

**Supplementary Figure 6:** *Gene expression analysis in pure PA6 cell cultures stimulated with FGF2.*

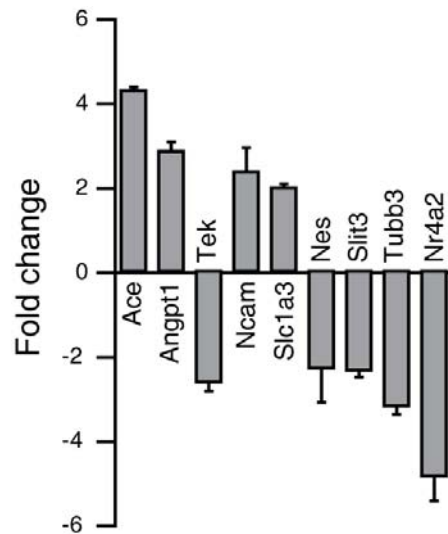

Confluent PA6 cells were stimulated with 20 ng/ml of FGF2 for three days in N2B27 medium and mRNAs were purified after 6 days. Gene expression was analyzed with a Taqman Low Density arrays by comparing mRNA levels in stimulated and not stimulated cells. Genes with a fold change  $>2$  were considered differentially expressed and are shown in the plot. The experiment was performed in duplicate; error bars indicate SEM.

**Supplementary Figure 7:** 2D *in vitro* differentiation of *Flk1*<sup>-/-</sup> and *Tal1*<sup>-/-</sup> ES cell lines.

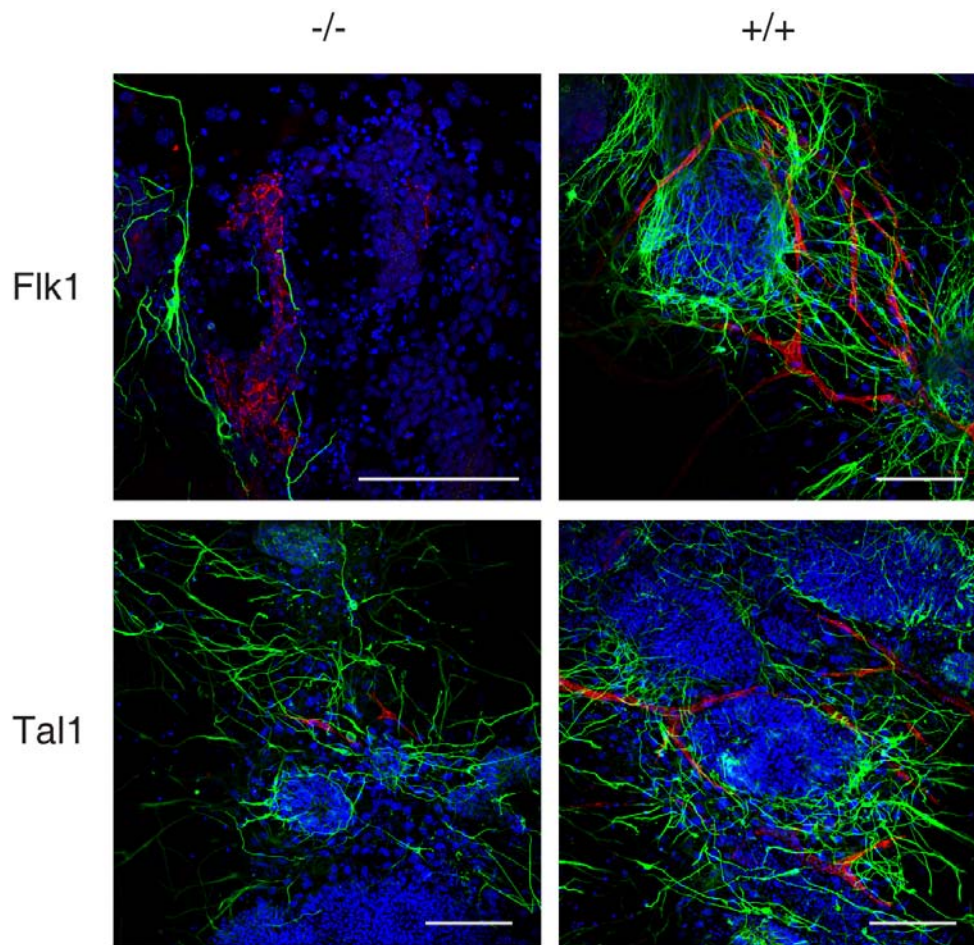

*Flk1*<sup>-/-</sup> and *Tal1*<sup>-/-</sup> ES cells, along with their parental wild type cell lines, were differentiated by co-culturing them with PA6 cells in N2B27 medium in presence of GFs. After seven days, cells were fixed and immunostained with anti-VE-Cadherin and anti- $\beta$ III-tubulin antibodies in order to detect endothelial cells (red) and neurons (green) respectively. Scale bars: 150  $\mu$ m.

**Supplementary Table 1:** *List of shRNA MISSION clones used to stably knock-down the expression of Flk1, Ace, Tal1 and T.*

shRNA targeting Flk1

TRCN0000055068

TRCN0000055069

TRCN0000055070

TRCN0000055071

TRCN0000055072

shRNA targeting Ace

TRCN0000031143

TRCN0000031142

TRCN0000031141

TRCN0000031140

TRCN0000031139

shRNA targeting Tal1

TRCN0000042576

TRCN0000042574

TRCN0000042573

TRCN0000042575

TRCN0000042577

shRNA targeting T

TRCN0000082003

TRCN0000082004

TRCN0000082006

TRCN0000082005

TRCN0000082007

**Supplementary Table 2:** *list of the genes used to customize the Taqman Low Density Array.*

| <b>Gene Name</b>                            | <b>Taqman Probe</b>   |
|---------------------------------------------|-----------------------|
| Angiotensin I converting enzyme             | Ace-Mm00802048_m1     |
| Alpha skeletal actin                        | Acta1-Mm00808218_g1   |
| Alpha-smooth muscle actin                   | Acta2-Mm00725412_s1   |
| Actin beta                                  | Actb-Mm00607939_s1    |
| Alk4                                        | Acvr1b-Mm00475708_m1  |
| ActRII                                      | Acvr2a-Mm00431657_m1  |
| Angiopoietin1                               | Angpt1-Mm00456503_m1  |
| Angiopoietin2 (antagonista di Angio1)       | Angpt2-Mm00545822_m1  |
| Cadherin2 (N-cadherin)                      | Cdh2-Mm00483213_m1    |
| VE-Cadherin                                 | Cdh5-Mm00486938_m1    |
| Choline acetyltransferase                   | Chat-Mm01221880_m1    |
| Chordin                                     | Chrd-Mm00438203_m1    |
| Calponin1                                   | Cnn1-Mm00487032_m1    |
| Pro-collagen 1 alpha2                       | Col1a2-Mm00483888_m1  |
| Cxcr4                                       | Cxcr4-Mm99999055_m1   |
| Doublecortin                                | Dcx-Mm00438401_m1     |
| Desmin                                      | Des-Mm00802455_m1     |
| EGFreceptor                                 | Egfr-Mm00433023_m1    |
| Endoglin                                    | Eng-Mm00468256_m1     |
| BLBP                                        | Fabp7-Mm00445225_m1   |
| Fap (fibroblast activation protein)         | Fap-Mm00484254_m1     |
| FGF2                                        | Fgf2-Mm00433287_m1    |
| FGF5                                        | Fgf5-Mm00438919_m1    |
| FGFR1                                       | Fgfr1-Mm00438923_m1   |
| FGFR2                                       | Fgfr2-Mm00438941_m1   |
| Flt-1 (VEGFR-1)                             | Flt1-Mm00438980_m1    |
| HNF3beta                                    | Foxa2-Mm00839704_mH   |
| SSEA-1                                      | Fut4-Mm00487448_s1    |
| GAD                                         | Gad2-Mm00484623_m1    |
| Galactosylceramidase (Galactocerebrosidase) | Galc-Mm00484646_m1    |
| GATA4                                       | Gata4-Mm00484689_m1   |
| Glucagon                                    | Gcg-Mm00801712_m1     |
| Glial fibrillar acidic protein              | Gfap-Mm00546086_m1    |
| Goosecoid                                   | Gsc-Mm00650681_g1     |
| Hemoglobin Z, beta-like embryonic chain     | Hbb-bh1-Mm00433932_g1 |
| CD102 (ICAM2)                               | Icam2-Mm00494862_m1   |
| ActivinbA (inhibin)                         | Inhba-Mm00434338_m1   |
| Insulin2                                    | Ins2-Mm00731595_gH    |
| Pdx1                                        | Ipfl1-Mm00435565_m1   |
| Flk-1 (VEGFR-2)                             | Kdr-Mm00440099_m1     |
| Keratin14                                   | Krt14-Mm00516876_m1   |
| Sca-1 (lymphocyte antigen 6 complex)        | Ly6a-Mm00726565_s1    |
| Mapt                                        | Mapt-Mm00521988_m1    |
| CD146                                       | Mcam-Mm00522397_m1    |
| Alpha cardiac MHC                           | Myh6-Mm00440354_m1    |
| Cardiac myosin ventricular light chain      | Myl2-Mm00440384_m1    |
| MyoD                                        | Myod1-Mm00440387_m1   |
| Myogenin                                    | Myog-Mm00446194_m1    |

|                                                   |                       |
|---------------------------------------------------|-----------------------|
| Ncam1                                             | Ncam1-Mm00456815_m1   |
| NeurofilamentH                                    | Nefh-Mm01191456_m1    |
| Nestin                                            | Nes-Mm00450205_m1     |
| neurogenin-3                                      | Neurog3-Mm00437606_s1 |
| NGFreceptor/p75                                   | Ngfr-Mm00446294_m1    |
| Nkx2.2                                            | Nkx2-2-Mm00839794_m1  |
| Nkx2.5                                            | Nkx2-5-Mm00657783_m1  |
| Nurr1                                             | Nr4a2-Mm00443056_m1   |
| Neuropilin-1                                      | Nrp1-Mm00435372_m1    |
| Neuropilin-2                                      | Nrp2-Mm00803101_m1    |
| Olig2                                             | Olig2-Mm01210556_m1   |
| Pax6                                              | Pax6-Mm00443072_m1    |
| CD31 (Pecam1)                                     | Pecam1-Mm00476702_m1  |
| Oct4 (Oct3, Oct3/4)                               | Pou5f1-Mm00658129_gH  |
| Protein C receptor                                | Procr-Mm00440992_m1   |
| CD133 (Prominin1)                                 | Prom1-Mm00477115_m1   |
| Roundabout1                                       | Robo1-Mm00803879_m1   |
| Roundabout2                                       | Robo2-Mm00620713_m1   |
| Roundabout3                                       | Robo3-Mm00487934_m1   |
| Roundabout4                                       | Robo4-Mm00452963_m1   |
| Semaphorin 3A                                     | Sema3a-Mm00436469_m1  |
| Vesicular glutamate transporter 1 (Vglut1)        | Slc17a7-Mm00812886_m1 |
| GLAST (glial high affinity glutamate transporter) | Slc1a3-Mm00600697_m1  |
| Slit1                                             | Slit1-Mm01198620_m1   |
| Slit2                                             | Slit2-Mm00662153_m1   |
| Slit3                                             | Slit3-Mm01326974_m1   |
| Sox2                                              | Sox2-Mm00488369_s1    |
| Synaptophysin                                     | Syp-Mm00436850_m1     |
| Brachyury                                         | T-Mm00436877_m1       |
| SCL                                               | Tal1-Mm00441665_m1    |
| TATA box binding protein                          | Tbp-Mm00446973_m1     |
| Tie-2                                             | Tek-Mm00443242_m1     |
| Tyrosine Hydroxylase                              | Th-Mm00447546_m1      |
| Thrombomodulin                                    | Thbd-Mm00437014_s1    |
| Thrombospondin-1                                  | Thbs1-Mm01335418_m1   |
| Tie-1                                             | Tie1-Mm00441786_m1    |
| Tryptophan Hydroxylase                            | Tph2-Mm00557717_m1    |
| Beta-III tubulin                                  | Tubb3-Mm00727586_s1   |
| VEGF A                                            | Vegfa-Mm00437304_m1   |
| Vimentin                                          | Vim-Mm00449201_m1     |
| Von Willebrand factor homolog                     | Vwf-Mm00550376_m1     |
| Rex1                                              | Zfp42-Mm01194090_g1   |
